# Supplementary material
Source: PubMed Central journal article supplement (PMC5106874)

## Supplementary Figure Legends

**Supp Fig 1** - (A) Genomic DNA sequence from *Mdm2<sup>PND/PND</sup>* mice. Sequence in blue is the deleted sequence from intron 3 of *Mdm2<sup>PND/PND</sup>* mice. (B) RT-qPCR for p53 targets in testes of *Mdm2<sup>PND/PND</sup>* mice. n=4, ± SEM.

**Supp Fig 2** - (A) Comparative weights of spleen, thymus and Brain from wild type and *Mdm2<sup>PND/PND</sup>* mice. (B) Representative images showing comparative size of brain in wild type and *Mdm2<sup>PND/PND</sup>* mice.

(A)

```
GCCAATGTGC
AATACCAACATGTCTGTGTCTACCGAGGGTGCTGCAAGCACCTCACAGATTC
CAGCTTCGGAACAAGAGACTCTGGTTGGTATTTCTGCCTCGAGTGTGTAATA
TAGCTTGTTTTACCAGGTAATCGAGGAAACAAAATTGAAACCTGGATTATCG
CACAGTCGTTTTAAGTATTTACCTACAACTCTTAACTTTCTCGATTGCAATTG
CATTAGAGAGTGGTCACTGCGACCTATATTCCACAGCCCTTCCCCTGACGCA
GGCTTTAGAAGTataactcgtataatgtatgctatacgaagtatggatcctagCTCGAGtctagaagcttgat
xxxxxxxxxxxxxxxx...Neomycin...xxxxxxxxxxxxxxxxxxxxxxxxxxxxxxxxxxxxxxxxgtcgacataac
ttcgtataatgtatgctatacgaagtatGCACAGTGTGTGGGTGCTGCTGGTTGTGACATGATG
TTCTATCACTGTTCTAAATGGTAAACCGAAAGTCATAGAAGCATCCGTGCTTT
```

(B)

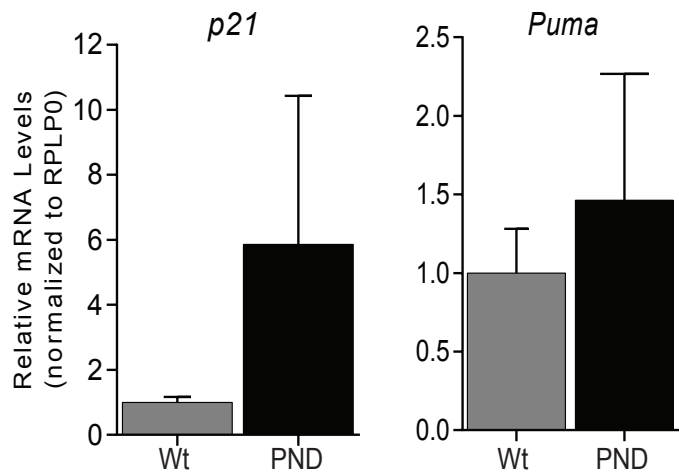

Supplementary Figure 2: Pant et al

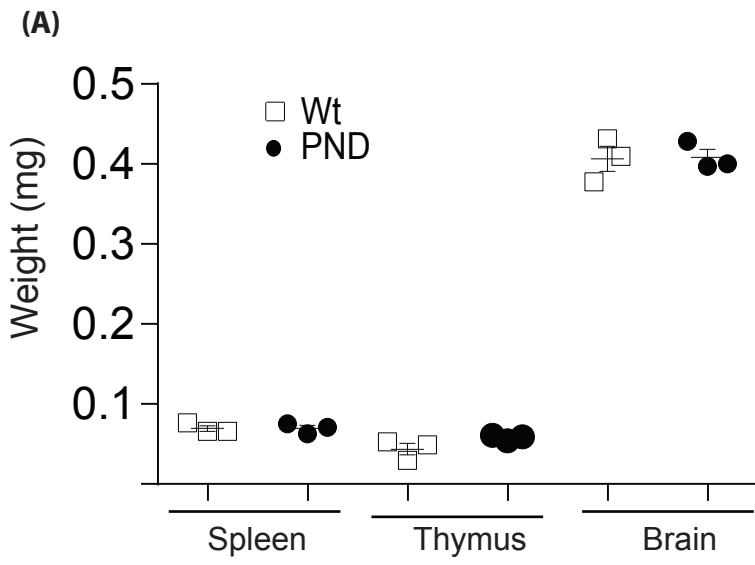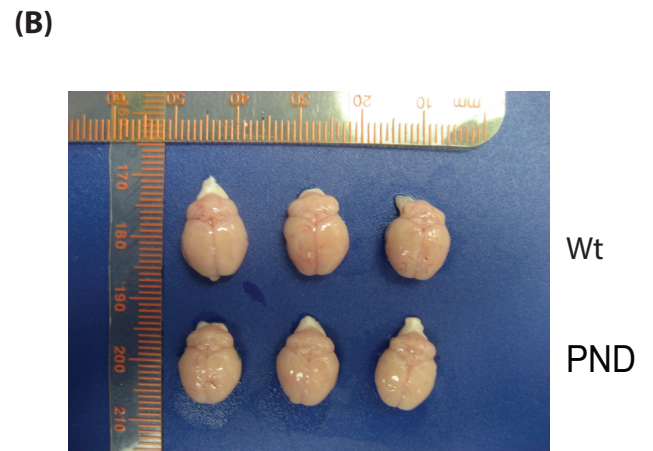

Supplement: NIHMS816572-supplement-supp.pdf [file NIHMS816572-supplement-supp.pdf]
